# Supplementary material
Source: PubMed Central journal article supplement (PMC545483)
Supplement: nar_32_22_e188__1.pdf [file nar_32_22_e188__1.pdf]

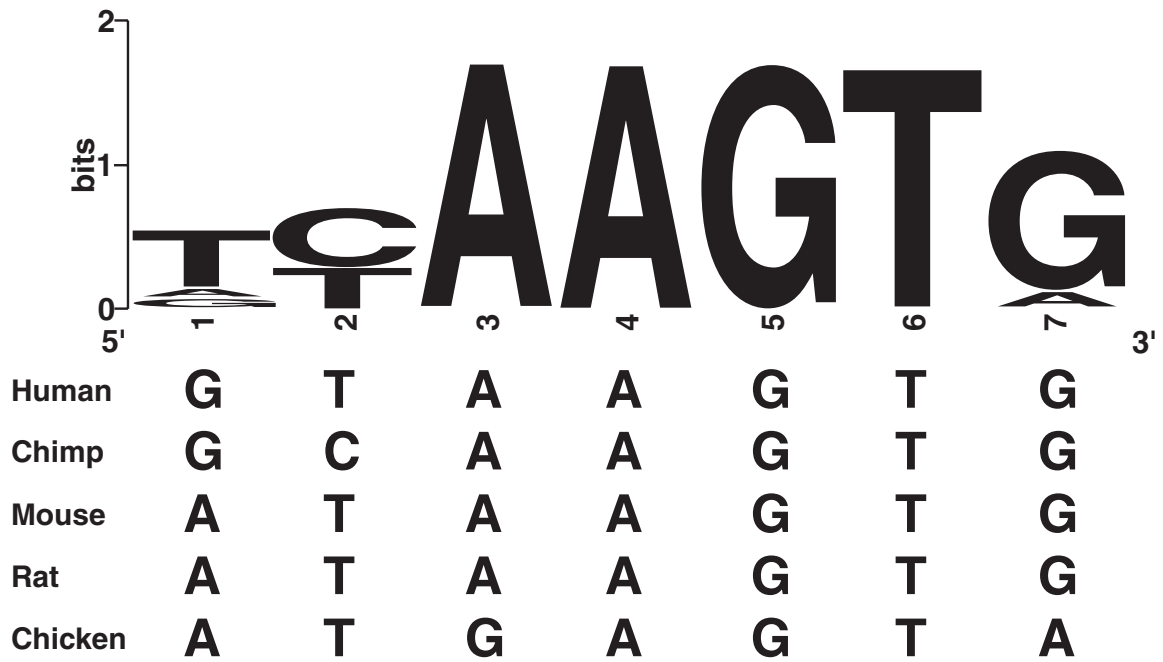

Figure 7. Cross-species conservation of homeo domain factor Nkx-2.5/Csx binding site located 1177bp upstream of mirRNA mir-194-1 / mir-215

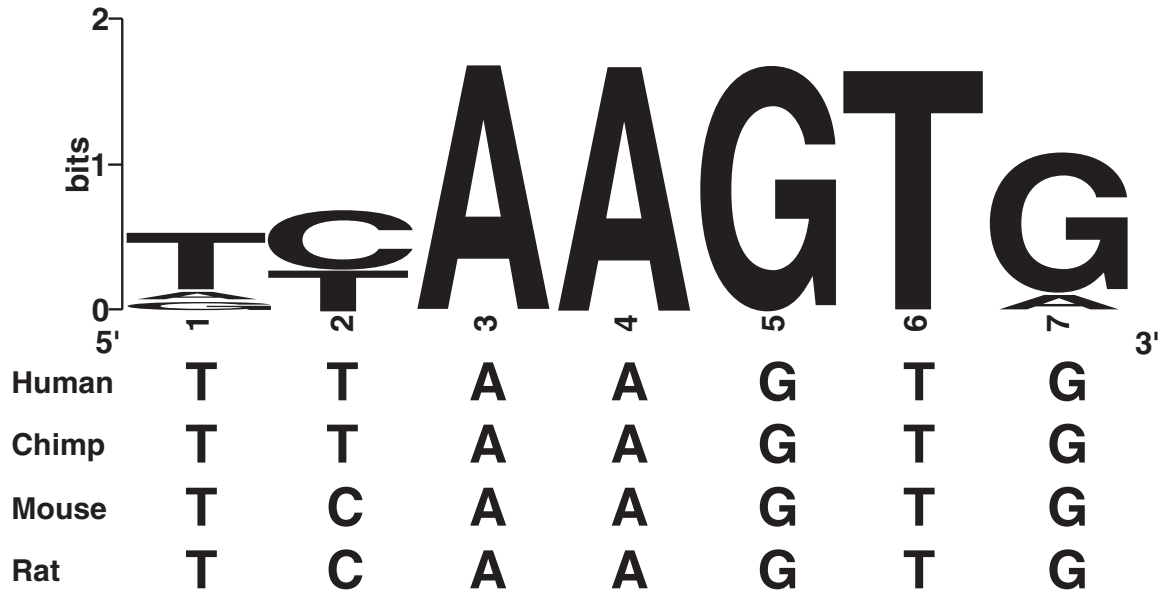

Figure 8. Cross-species conservation of homeo domain factor Nkx-2.5/Csx binding site located 3496bp upstream of mirRNA mir-216

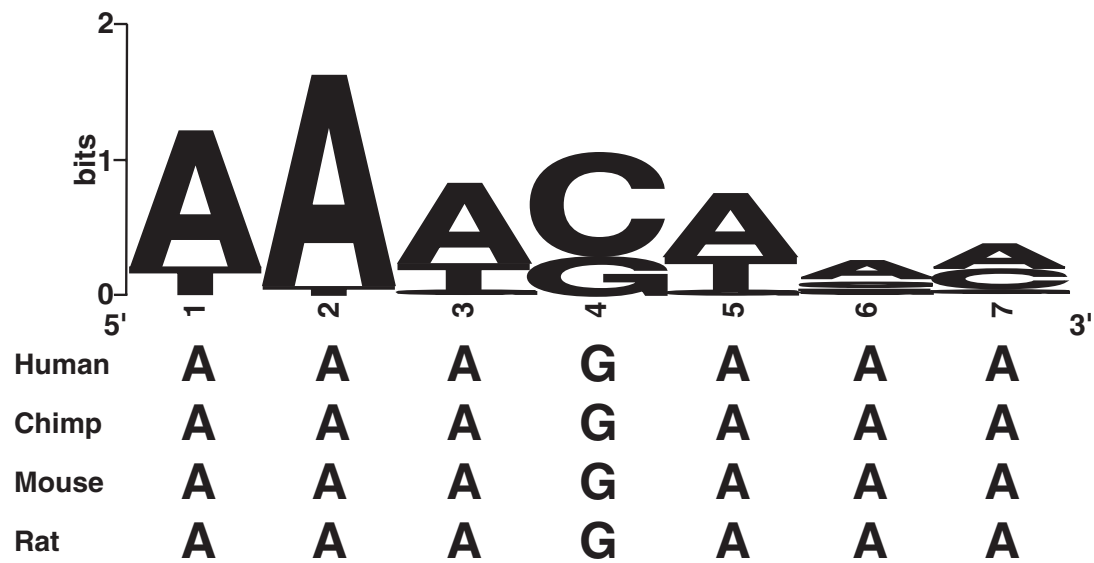

**Figure 9. Cross-species conservation of sex-determining region Y gene product binding site located 600bp upstream of mirRNA mir-194-1/mir-215**

Figure 9  
Nucleic Acids Research  
Perera, et al.

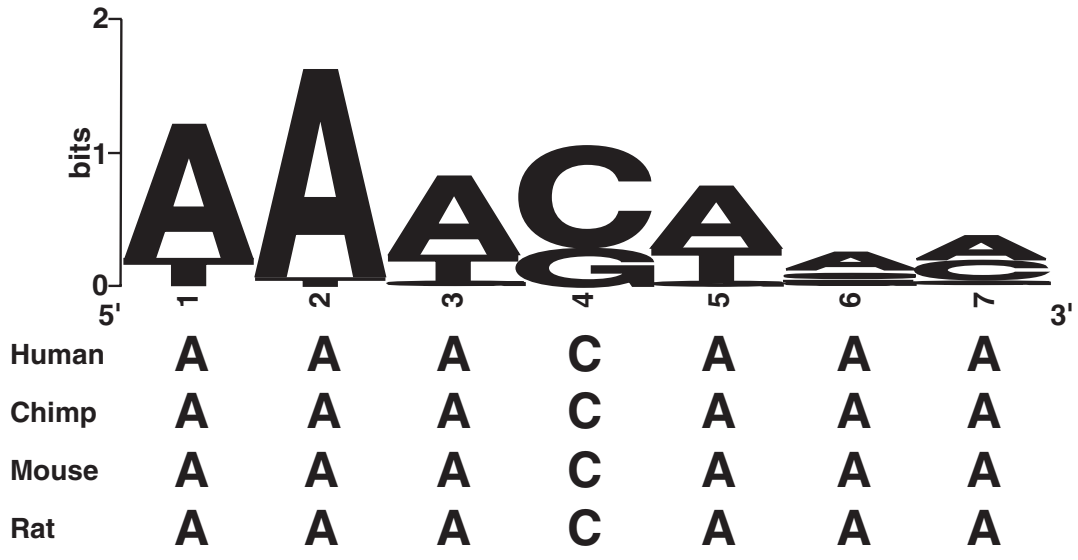

Figure 10. Cross-species conservation of sex-determining region Y gene product binding site located 3484bp upstream of mirRNA mir-216

Figure 10  
 Nucleic Acids Research  
 Perera, et al.

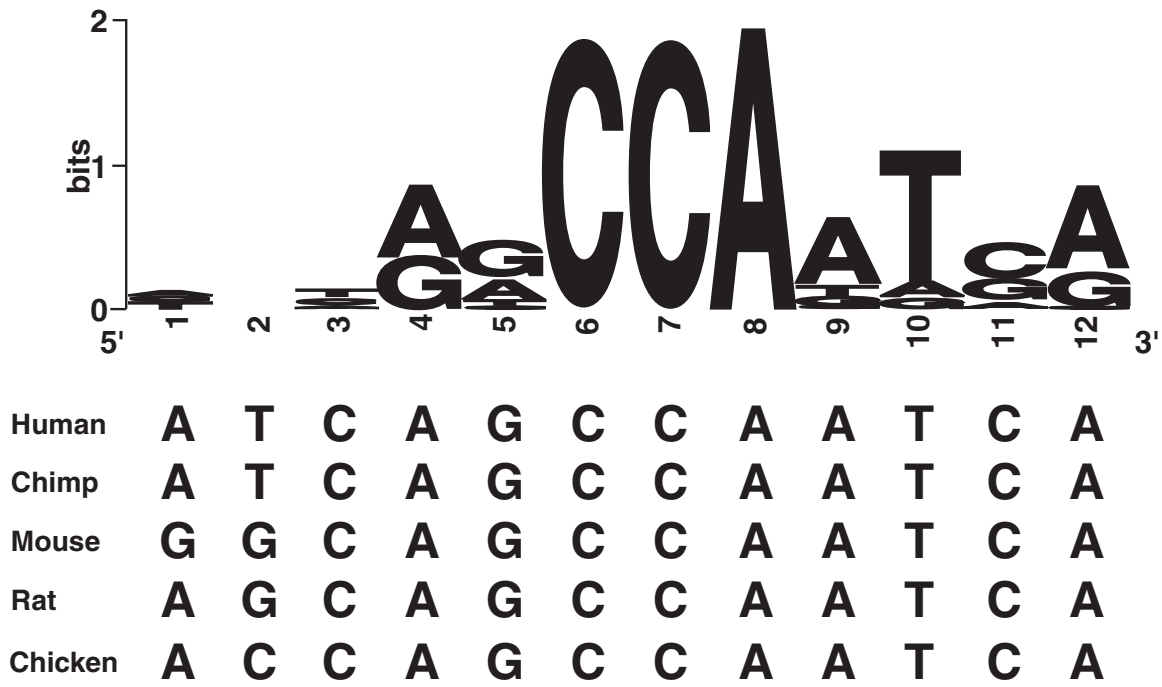

Figure 11. Cross-species conservation of CAAT Box binding site located 937bp upstream of mirRNA mir-194-1/mir-215

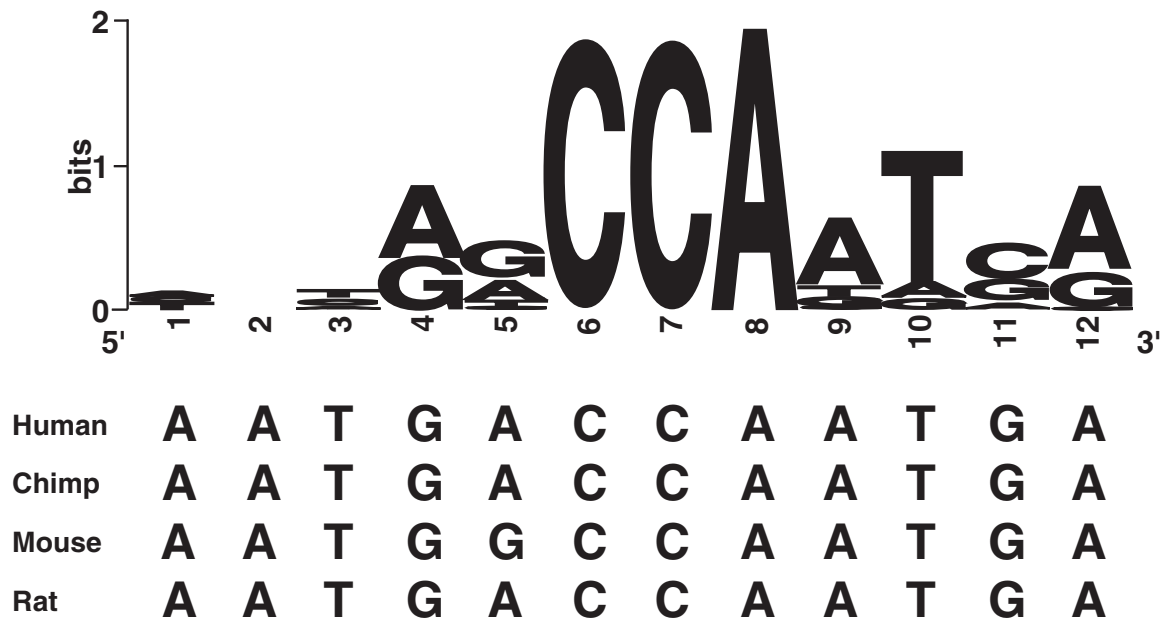

Figure 12. Cross-species conservation of CAAT Box binding site located 227bp upstream of mirRNA mir-194-1/mir-215

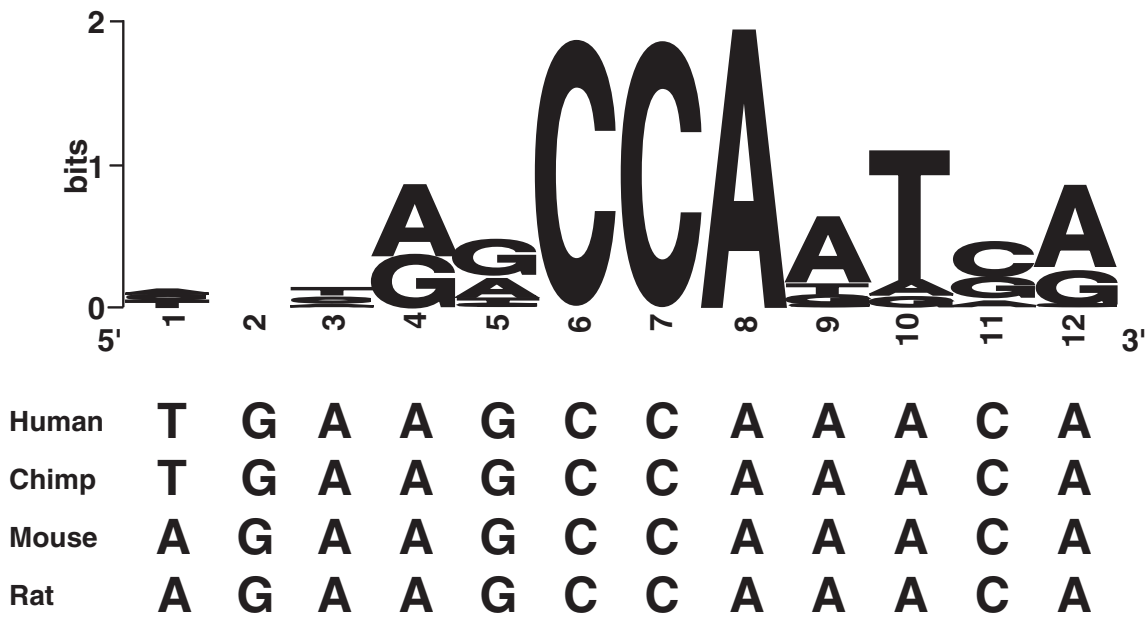

Figure 13. Cross-species conservation of CAAT Box binding site located 3351bp upstream of mirRNA mir-216
